# Supplementary material for: Molecular and biochemical characterization of a potato collection with contrasting tuber carotenoid content
Source: PLoS One. 2017 Sep 12;12(9):e0184143. doi: 10.1371/journal.pone.0184143 (PMC5595298; doi:10.1371/journal.pone.0184143)
Supplement: S2 Table — Data represent normalized fold-ISTD values of three replicates (1–3). Averages (AVG) and standard deviations (ST DEV) are further indicated. (XLSX) [file pone.0184143.s008.xlsx]

## Sheet: S2 Table
S2 Table. Levels of non-polar metabolites in potato genotypes measured by LC-APCI-HRMS. Data represent normalized fold-ISTD values of three replicates (1-3). Averages (AVG) and standard deviations (ST DEV) are further indicated.
Fold ISTD/DW	Fontane	Fontane	Fontane	Fontane	Fontane	Laura	Laura	Laura	Laura	Laura	E60/1	E60/1	E60/1	E60/1	E60/1	Melrose	Melrose	Melrose	Melrose	Melrose	Mayan Gold	Mayan Gold	Mayan Gold	Mayan Gold	Mayan Gold	Daifla	Daifla	Daifla	Daifla	Daifla	S. Chaco	S. Chaco	S. Chaco	S. Chaco	S. Chaco	Andean Sun	Andean Sun	Andean Sun	Andean Sun	Andean Sun	Papapura	Papapura	Papapura	Papapura	Papapura
Tocochromanols	1	2	3	AVG	ST DEV	1	2	3	AVG	ST DEV	1	2	3	AVG	ST DEV	1	2	3	AVG	ST DEV	1	2	3	AVG	ST DEV	1	2	3	AVG	ST DEV	1	2	3	AVG	ST DEV	1	2	3	AVG	ST DEV	1	2	3	AVG	ST DEV
α-Tocopherol	0.006	0.006	0.006	0.006	0.0002	0.007	0.005	0.005	0.006	0.0009	0.004	0.006	0.006	0.005	0.0008	0.006	0.005	0.006	0.006	0.0007	0.004	0.004	0.005	0.004	0.0002	0.006	0.005	0.005	0.006	0.0005	0.004	0.004	0.005	0.004	0.0004	0.006	0.006	0.006	0.006	0.0004	0.006	0.006	0.006	0.006	0.0003
alpha-tocopherol-quinone	0.063	0.081	0.088	0.077	0.0133	0.051	0.059	0.048	0.053	0.0057	0.038	0.051	0.051	0.047	0.0078	0.064	0.074	0.074	0.071	0.0057	0.046	0.05	0.048	0.048	0.0019	0.063	0.049	0.05	0.054	0.0081	0.045	0.048	0.044	0.046	0.0025	0.008	0.01	nv	0.009	0.0011	0.016	0.014	0.017	0.015	0.0016
b-/g-tocotrienol	0.015	0.019	0.01	0.015	0.0045	0.014	0.011	0.011	0.012	0.0017						0.005	0.005	0.005	0.005	0.0003	0.009	0.01	nd	0.01	0.0007	0.001	0.002	0.001	0.001	0.0003	0.018	0.012	0.019	0.016	0.0035	0.013	0.013	0.016	0.014	0.0019	0.01	nd	0.006	0.008	0.0023
d-tocopherol	0.01	0.012	0.013	0.012	0.0016	0.006	0.008	0.007	0.007	0.0011	0.006	0.01	0.009	0.008	0.0024	0.009	0.014	0.011	0.011	0.0026	0.005	0.005	0.005	0.005	0.0003	0.009	0.011	0.011	0.01	0.0011	0.003	0.004	0.004	0.004	0.0004				nd					nd
Quinons
plastoquinol-9	0.018	0.024	0.018	0.02	0.0036	0.045	0.052	0.035	0.044	0.0086	0.012	0.013	0.011	0.012	0.001	0.022	0.014	0.018	0.018	0.0036						0.022	0.02	0.02	0.021	0.001	0.022	0.023	0.014	0.02	0.0052	0.043	0.038	0.045	0.042	0.0036	0.02	0.017	0.026	0.021	0.0047
menaquinone-8	0.038	0.036	0.029	0.035	0.0049	0.075	0.055	0.045	0.059	0.0149	0.032	0.038	0.046	0.039	0.007	nd	0.028	0.027	0.028	0.0003	0.042	0.037	0.037	0.039	0.0029	0.035	0.043	0.04	0.039	0.0039	0.003	0.004	0.004	0.004	0.0005	0.049	0.043	0.057	0.05	0.0069	0.006	0.005	0.005	0.005	0.0009
menaquinone-8 isomer	0.008	0.004	0.002	0.005	0.0029	0.005	0.004	0.005	0.005	0.0007	0.005	0.006	0.006	0.006	0.0009	0.003	0.006	0.004	0.004	0.0017	0.006	0.006	0.006	0.006	0.0002	0.004	0.004	0.006	0.005	0.0009	0.002	nd	0.002	0.001	0.0011	0.005	0.005	0.005	0.005	0.0003	0.004	0.003	0.002	0.003	0.001
phylloquinone	0.004	0.005	0.006	0.005	0.0013	0.047	0.048	0.037	0.044	0.0058	0.002	0.002	0.005	0.003	0.002	0.003	0.001	0.004	0.003	0.0013	0.089	0.091	0.092	0.09	0.0011	0.032	0.035	0.033	0.033	0.0014	0.01	0.011	0.008	0.01	0.0016	0.017	0.024	0.029	0.023	0.0057	0.017	0.017	0.023	0.019	0.0037
plastoquinone	0.024	0.031	0.027	0.027	0.0037	0.032	0.025	0.018	0.025	0.0069	0.015	0.02	0.021	0.019	0.0032	0.009	0.011	0.011	0.01	0.0015	0.039	0.052	0.045	0.045	0.0068	0.096	0.096	0.094	0.095	0.0011	0.127	0.144	0.104	0.125	0.0201	0.193	0.191	0.199	0.194	0.0043	0.076	0.061	0.077	0.071	0.0093
ubiquinone-8	0.005	0.006	0.005	0.005	0.0008																					0.005	0.008	0.006	0.006	0.0011	0.007	0.007	0.006	0.007	0.0008	0.013	0.015	0.015	0.014	0.0008	0.007	0.006	0.006	0.006	0.0007
ubiquinone-10	0.841	1	1.028	0.956	0.1008	1.453	1.192	0.961	1.202	0.2465	0.621	0.868	0.845	0.778	0.1364	0.476	0.768	0.72	0.655	0.1568	0.667	0.761	0.714	0.714	0.0472	1.076	1.076	1.047	1.066	0.0166	0.96	1.051	0.813	0.941	0.1202	1.811	1.848	1.894	1.851	0.0413	1.048	0.873	0.952	0.958	0.088
ubiquinone-9	0.054	0.054	0.053	0.053	0.0005	0.141	0.125	0.089	0.118	0.027	0.035	0.043	0.04	0.039	0.0044	0.043	0.054	0.047	0.048	0.0058	0.048	0.047	0.045	0.047	0.0012						0.017	0.013	0.02	0.017	0.0036	0.012	0.011	0.011	0.011	0.0008	0.005	0.003	0.004	0.004	0.0008
Sterols
d-5-avenasterol	0.041	0.041	0.04	0.041	0.0005	0.035	0.038	0.04	0.038	0.0027	0.045	0.039	0.035	0.04	0.0047	0.04	0.04	0.041	0.04	0.0007	0.034	0.039	0.039	0.037	0.0029	0.038	0.039	0.04	0.039	0.001	0.042	0.038	0.04	0.04	0.0021	0.042	0.037	0.04	0.04	0.0024	0.04	0.039	0.039	0.039	0.0003
beta-sitosterol	2.675	2.246	2.044	2.322	0.3223	3.421	2.871	2.4	2.898	0.5109	1.962	2.986	2.979	2.642	0.5893	1.453	1.494	1.44	1.462	0.0278	2.318	2.246	2.291	2.285	0.0365	4.969	4.974	4.908	4.95	0.0369	0.675	0.899	0.666	0.747	0.1319	2.66	3.024	3.738	3.141	0.5486	0.696	0.55	0.63	0.625	0.073
Triterpene
squalene	0.021	0.02	0.029	0.023	0.0047	0.05	0.039		0.044	0.0077	0.01	0.012	0.013	0.012	0.0017	0.024	0.019	0.021	0.021	0.0026	0.013	0.023	0.02	0.019	0.005	0.014	0.017	0.017	0.016	0.0015	0.002	0.002	0.002	0.002	0.0001	0.021	0.021	0.02	0.021	0.0008	0.004	0.003	0.003	0.003	0.0005
Fatty acid
myristoleic_Acid	0.004	0.003	0.003	0.003	0.0005	0.002	0.003	0.003	0.002	0.0006	0.013	0.011	0.008	0.01	0.0028	0.007	0.01	0.013	0.01	0.0027	0.008	0.011	0.01	0.009	0.0017	0.011	0.008	0.014	0.011	0.003	0.009	0.009	0.013	0.011	0.0024	0.009	0.009	0.008	0.009	0.0004	0.011	nd	0.002	0.007	0.0059
oxo-nonadecanoic acid	0.006	0.007	nd	0.006	0.0004	0.053	0.045	0.036	0.045	0.0085	0.018	0.016	0.011	0.015	0.0034	0.008	0.005	0.006	0.006	0.0014	0.075	0.086		0.081	0.0081	0.02	0.017	0.015	0.017	0.0029	0.004	0.003	0.004	0.004	0.001	0.015	0.015	0.017	0.016	0.0012	0.003	0.005	0.005	0.004	0.0012
hydroxy-octadecanoic acid	5.375	4.882	6.719	5.659	0.951	12.072	11.387	11.729	11.729	0.3422	7.509	8.436	6.582	7.509	1.311	5.093	4.754	3.777	4.541	0.6837	5.365	5.094	5.229	5.229	0.1358	6.912	6.261	5.743	6.305	0.5862	1.867	1.687	1.256	1.603	0.3139	8.158	9.101	9.169	8.809	0.5653	5.405	5.357	5.45	5.404	0.0466
11c-Eicosenoic_Acid*	0.011	0.014	0.013	0.013	0.0015	0.008	0.005	0.01	0.008	0.0022	0.012		0.011	0.012	0.0006	0.015	0.013	0.014	0.014	0.0011	0.013	0.013	0.013	0.013	0.0002	0.015	0.016	0.011	0.014	0.0027	0.013	0.016	0.019	0.016	0.0029	0.011	0.008	0.01	0.01	0.0015	0.016	0.019	0.011	0.015	0.0037
linoleic Acid*	0.015	0.02	0.017	0.017	0.0024	0.056	0.035	0.044	0.045	0.0106	0.005	0.004	0.005	0.005	0.0001	0.01	0.013	0.016	0.013	0.0031	0.014	0.013	0.014	0.013	0.0007	0.009	0.009	0.012	0.01	0.0016	0.026	0.04	0.028	0.031	0.0078	0.007	nd	0.01	0.008	0.002	0.01	0.01	0.007	0.009	0.0016
linolenic Acid*						0.272	0.191	nd	0.231	0.0568	nd	0.289	0.389	0.339	0.0708	0.033	0.045	nd	0.039	0.0085											0.41	0.51	0.54	0.487	0.068	0.219	nd	0.222	0.221	0.0022	nd	0.165	0.113	0.139	0.0368
palmitoleic acid	0.005	0.003	0.005	0.004	0.0011	0.006	0.006	0.005	0.005	0.0005	0.003	0.005	0.004	0.004	0.0009	0.005	0.004	0.004	0.004	0.0005	0.004	0.003	0.004	0.004	0.0007	0.004	0.004	0.004	0.004	0.0001	nd	0.003	0.003	0.003	0.0001	0.005	0.008	0.006	0.007	0.0013	0.004	0.004	0.004	0.004	0.0002
octadecenoic acid	0.003	0.003	0.003	0.003	0.0005	0.004	0.004	0.003	0.004	0.0007	0.002	0.003	0.003	0.003	0.0004	0.003	0.003	0.003	0.003	0.0002	0.002	0.002	0.002	0.002	0.0001	0.003	0.003	0.002	0.003	0.0007	0.003	0.003	0.003	0.003	0.0002	0.003	0.003	0.004	0.003	0.0005	0.003	0.003	0.003	0.003	0.0003
methyl-linoleate	0.047	0.06	0.066	0.058	0.0094	0.101	0.11	0.06	0.09	0.0268	0.091	0.089	0.093	0.091	0.0021	0.091	0.093	0.094	0.092	0.0018	0.058	0.073	0.064	0.065	0.0075	0.068	0.053	0.043	0.055	0.0123	0.021	0.019	0.016	0.018	0.0025	0.082	0.096	0.097	0.092	0.0083	0.038	0.044	0.066	0.049	0.0146
ricinoleate	0.004	0.006	0.001	0.004	0.0022	0.003	0.003	0.003	0.003	0	0.001	0.002	0.002	0.002	0.0006	0.003	0.004	nd	0.003	0.0007	0.006	0.004	0.005	0.005	0.0006	0.008	0.01	0.007	0.009	0.0016	nd	0.013	0.017	0.015	0.0026	0.007	nd	0.011	0.009	0.0027	nd	0.002	0.003	0.003	0.0004
palmitic acid	0.003	0.003	0.002	0.003	0.0004	0.012	0.01	0.016	0.013	0.0032	0.005	0.006	0.007	0.006	0.0013	0.006	0.007	0.01	0.008	0.0017	0.007	0.005		0.006	0.0009	0.001	0.002	0.002	0.002	0.0003	nd	0.002	0.002	0.002	0.0002	0.005	0.004	0.003	0.004	0.0009	0.005	0.001	nd	0.003	0.0029
Phospholipids
l-α-phosphatidylcholine*		0.001	0.002	0.002	0.0005	0.001	0.0003	0.001	0.001	0.0006				nd							0.001	0.001	nd	0.001	0									nd		0.008	0.014	0.014	0.012	0.0037				nd
Diacylglycerols
DG(19:0-22:3-0:0)						0.015	0.013	0.012	0.013	0.0014	0.005	0.006	0.007	0.006	0.0008	0.01	0.011	0.009	0.01	0.0006	0.025	0.02	0.024	0.023	0.0027	0.017	0.019	0.018	0.018	0.0007						0.062	0.047	0.055	0.054	0.0071
MGDG(18:3-18:3)	0.002	0.002	0.003	0.002	0.0005	0.003	0.003	0.002	0.003	0.0004						0.001	0.002	0.003	0.002	0.0008	0.003	0.002	0.002	0.002	0.0006	0.002	0.003	0.003	0.003	0.0004	0.005	0.004	0.003	0.004	0.0009	0.006	0.007	0.005	0.006	0.0008	nd	0.001	0.001	0.001	0.0004
MGDG (18:2-18:3)	0.055	nd	0.036	0.046	0.0139	0.015	0.019	nd	0.017	0.0031	0.028	0.02	nd	0.024	0.0058	nd	0.055	0.063	0.059	0.0059	0.046	0.048	0.05	0.048	0.002	0.063	nd	0.058	0.06	0.0033	0.006	0.005	nd	0.005	0.0006	0.027	0.018	nd	0.023	0.0069	nd	0.004	0.004	0.004	0.0003
MGDG (18:1-16:2)	0.008	0.01	0.009	0.009	0.0011	0.009	0.009	0.011	0.01	0.0008	0.005	0.009	0.009	0.008	0.002	0.006	0.007	0.008	0.007	0.0012						0.008	0.008	0.009	0.008	0.0007						0.002	0.002	nd	0.002	0.0001	0.001	0.001	0.001	0.001	0.0002
Di-/tri-glycerides					0																									0
cis-9-1.2-diolein(c18:1)*	0.007	0.009	0.007	0.008	0.001	nd	0.011	0.014	0.012	0.0016	0.011	0.012	0.015	0.013	0.0021	nd	0.011	0.011	0.011	0.0003						0.01	0.011	0.011	0.011	0.0005	0.011	0.017	0.012	0.014	0.0032	0.011	0.01	0.011	0.011	0.0009				nd
cis-9-triolein(c18:1)*	0.019	0.024	0.025	0.023	0.0033	0.018	0.013	0.01	0.014	0.0039	0.041	0.052	0.054	0.049	0.0072	0.008	0.011	0.011	0.01	0.0018	0.049	0.055	nd	0.052	0.0041	0.012	0.013	0.012	0.012	0.0006	0.021	0.022	0.018	0.02	0.0021	0.052	0.047	0.048	0.049	0.0029	0.011	0.009	0.012	0.011	0.0018
