# Supplementary material for: Molecular and biochemical characterization of a potato collection with contrasting tuber carotenoid content
Source: PLoS One. 2017 Sep 12;12(9):e0184143. doi: 10.1371/journal.pone.0184143 (PMC5595298; doi:10.1371/journal.pone.0184143)
Supplement: S8 Table — Data are expressed as fold change using cv. Daifla as calibrator (FC = 1.000). Data are the average of at least two replications. (XLSX) [file pone.0184143.s014.xlsx]

## Sheet: S8 Table
S8 Table. Fold change of genes of the carotenoid pathway in the potato core collection, measured by qPCR. Data are expressed as fold change using cv. Daifla as calibrator (FC=1.000). Data are the average of at least two replications.
Fold/STD	Fontane		Laura		E60/1		Melrose		Mayan Gold		Daifla		S. chacoense		Andean Sunside		Papapura		ISCI105/07-8
GENES	avg	st dev	avg	st dev	avg	st dev	avg	st dev	avg	st dev	avg	st dev	avg	st dev	avg	st dev	avg	st dev	avg	st dev
Phytoene synthase 1 - PSY1	0.093	0.019	0.49	0.013	0.301	0.08	0.246	0.002	0.101	0.032	1	0.081	0.049	0.003	0.018	0.005	0.086	0.003	0.0044	0.002
Phytoene synthase 2 - PSY2	1.331	0.222	1.866	0.096	0.832	0.656	5.907	1.898	0.923	0.17	1	0.007	1.693	0.129	1.373	0.63	1.216	0.012	2.049	0.156
Phytoene desaturase - PDS	0.607	0.241	0.079	0.013	0.701	0.316	0.319	0.45	0.14	0.163	1	0.387	0.645	0.021	0.674	0.179	0.517	0.183	0.175	0.602
Licopene-β cyclase - LCYb	0.712	0.305	0.732	0.043	0.275	0.221	0.881	0.621	0.553	0.234	1	0.034	0.438	0.066	0.45	0.214	0.457	0.049	0.109	0.337
Licopene-ε cyclase - LCYe	1.577	0.182	1.588	0.152	0.328	0.002	2.231	0.4	1.229	0.045	1	0.192	0.03	0.026	0.329	0.119	1.744	0.081	1.092	0.088
β-carotene hydroxylase 2 - CHY2	23.264	1.939	39.947	0	102.556	9.556	89.264	1.313	119.428	2.927	1	0.372	1.735	0.307	76.373	5.243	62.035	6.086	40.36	5.548
Zeaxanthin epoxidase - ZEP	2.74	0.493	3.86	0.363	3.329	0.049	1.324	0.202	1.659	0.114	1	0.286	1.873	0.101	0.635	0.217	0.779	0.349	0.019	0.005
