# Supplementary material for: Molecular and biochemical characterization of a potato collection with contrasting tuber carotenoid content
Source: PLoS One. 2017 Sep 12;12(9):e0184143. doi: 10.1371/journal.pone.0184143 (PMC5595298; doi:10.1371/journal.pone.0184143)
Supplement: S13 Table — (XLSX) [file pone.0184143.s019.xlsx]

## Sheet: S13 Table
S13 Table. Matrix correlation analysis of post-harvest traits, metabolic and gene expression levels in tubers.
	tuber dormancy	weight loss	PSY1	PSY2	PDS	LCYb	LCYe	CHY2	ZEP	a-tocopherol-quinone	b-/g-tocotrienol	d-tocopherol	plastoquinol-9	menaquinone-8	phylloquinone	plastoquinone	ubiquinone-8	ubiquinone-10	ubiquinone-9	b-sitosterol	squalene	myristoleic acid	oxo-nonadecanoic acid	hydroxy-octadecanoic acid	linoleic acid	linolenic acid	palmitic acid	DG(19:0-22:3-0:0)	MGDG(18:3-18:3)	MGDG(18:2-18:3)	MGDG(18:1-16:2)	cis-9-triolein(C18:1)	neoxanthin-myristate	violaxanthin-myristate	9-cis-violaxanthin-myristate	lutein-myristate	zeaxanthin-myristate	violaxanthin-dimyristate	9-cis-violaxanthin-dimyristate	violaxanthin-palmitate-myristate	zeaxanthin/lutein-dimyristate	antheraxanthin-dimyristate	neoxanthin-dipalmitate	antheraxanthin-palmitate-myristate	lutein	β-carotene	zeaxanthin	antheraxanthin	9-cis-violaxanthin
tuber dormancy	1	-0.624196	0.168491	0.371493	0.116826	0.0478812	-0.199332	-0.404504	0.471632	0.459382	0.120873	-0.0705978	-0.337166	-0.214535	-0.584486	-0.2285	-0.355478	-0.289426	0.233524	-0.183824	-0.03722	0.140756	-0.44931	-0.210068	0.464201	0.769355	0.150796	-0.72986	0.102234	-0.159437	0.79739	-0.38732	0.32035	0.515901	-0.119651	0.34853	-0.669866	0.360295	0.378203	0.550501	-0.699738	0.415682	0.570688	0.339736	-0.332899	-0.238806	-0.536612	-0.281711	-0.117473
weight loss	-0.624196	1	-0.526942	-0.341782	-0.0516781	-0.496823	-0.106957	0.209766	-0.599416	-0.796003	0.176573	-0.742051	0.134212	-0.462046	0.280347	0.490946	0.307552	0.236118	-0.50229	-0.447629	-0.513676	0.0427226	0.0816733	-0.22536	-0.274363	-0.152933	-0.376888	0.808353	-0.0222463	-0.506273	-0.936903	0.193994	-0.23416	-0.457349	-0.243877	-0.239059	0.235505	-0.355342	-0.315174	-0.461908	0.909165	-0.528629	-0.413054	-0.182706	-0.183579	-0.488933	0.772757	-0.062577	-0.160549
PSY1	0.168491	-0.526942	1	-0.0575538	0.334662	0.663043	0.100706	-0.387143	0.0883105	0.284593	-0.722082	0.296164	-0.0187155	0.347573	0.10382	-0.154488	-0.308485	-0.0477426	0.0353154	0.760671	0.271159	0.149745	0.0498997	0.299925	0.0639321	-0.461658	0.0791644	-0.410163	-0.068214	0.443642	0.506951	-0.382449	-0.113061	-0.558815	0.618099	-0.401343	-0.664554	-0.0949802	-0.435767	-0.566606	-0.868086	-0.216181	-0.600381	-0.778877	0.322818	0.0347145	-0.394387	-0.138904	-0.0255874
PSY2	0.371493	-0.341782	-0.0575538	1	-0.32306	0.440011	0.551185	0.160374	-0.129191	0.399775	-0.280193	0.359452	-0.100562	-0.103863	-0.323167	-0.3084	0.207656	-0.287709	0.205431	-0.300457	0.174095	0.135209	-0.254659	-0.190355	0.080084	0.484457	0.383385	-0.259854	-0.16042	0.352499	0.0976067	-0.436283	0.13352	0.26279	-0.128904	0.542756	0.890018	0.226203	0.273368	0.295283	-0.0824996	0.37451	0.280274	0.162806	-0.0779606	0.0889438	-0.00791296	-0.0556244	-0.191343
PDS	0.116826	-0.0516781	0.334662	-0.32306	1	0.00567578	-0.505529	-0.473456	-0.351465	-0.147233	-0.212137	0.299798	-0.428356	-0.227912	-0.497982	0.464191	-0.0293832	0.23839	-0.750994	0.380261	-0.531763	0.464129	-0.622092	-0.249408	-0.497275	0.045433	-0.780049	0.184953	0.320813	0.0707062	-0.17658	-0.0320147	-0.707502	-0.407301	0.0667497	-0.807244	-0.334041	-0.831958	-0.674783	-0.423704	-0.0262888	-0.731013	-0.440431	-0.143398	-0.636062	-0.814792	-0.0222044	-0.626919	-0.665584
LCYb	0.0478812	-0.496823	0.663043	0.440011	0.00567578	1	0.589393	-0.388906	-0.123517	0.56963	-0.708541	0.588741	0.0720354	0.243538	0.0989687	-0.237655	-0.437046	-0.113463	0.167863	0.462238	0.435646	-0.0835917	0.014106	0.0599405	0.167643	-0.626383	0.117163	-0.228357	-0.26728	0.724451	0.454139	-0.621209	-0.0417033	-0.282724	0.44341	0.0646158	-0.625638	0.0853446	-0.113212	-0.318932	-0.939794	0.0708407	-0.465229	-0.656694	0.274445	0.223041	-0.292969	-0.179278	-0.235062
LCYe	-0.199332	-0.106957	0.100706	0.551185	-0.505529	0.589393	1	0.145626	-0.00836353	0.397361	-0.45571	0.61087	-0.0140709	0.0315856	0.0819132	-0.62841	-0.584319	-0.3749	0.380566	-0.155681	0.381817	-0.446469	0.0736494	0.104938	0.0695288	-0.649266	0.424511	-0.460839	-0.783889	0.403212	0.141152	-0.549002	0.332423	0.326764	0.50747	0.68336	-0.768289	0.57778	0.474827	0.310579	-0.556911	0.354963	0.195831	-0.0329842	0.496502	0.563518	0.219354	0.152425	0.0232079
CHY2	-0.404504	0.209766	-0.387143	0.160374	-0.473456	-0.388906	0.145626	1	-0.0214463	-0.194105	-0.0762878	-0.107632	-0.0561356	0.232592	0.303715	-0.266443	0.644547	-0.20345	0.130908	-0.169408	0.0585665	0.179833	0.456323	0.16611	-0.443745	-0.188033	0.422662	0.0155693	-0.158686	0.118132	-0.335304	0.631417	-0.0401705	0.0315473	-0.244145	0.130282	0.747933	0.0457682	0.000528296	0.0944261	0.66609	0.333817	0.256981	0.450853	0.311035	0.0844482	0.235421	0.759232	0.587737
ZEP	0.471632	-0.599416	0.0883105	-0.129191	-0.351465	-0.123517	-0.00836353	-0.0214463	1	0.485677	0.40713	-0.0848649	0.052834	0.39614	-0.0501056	-0.601902	-0.543067	-0.235884	0.804724	0.051363	0.520991	-0.513964	0.208535	0.421013	0.561455	0.399211	0.581034	-0.613496	-0.148749	-0.149003	0.764904	0.0613147	0.711649	0.751366	0.250014	0.480601	-0.875879	0.748136	0.736146	0.752461	-0.357651	0.707687	0.773731	0.493828	0.450973	0.662286	-0.555421	0.358782	0.613646
a-tocopherol-quinone	0.459382	-0.796003	0.284593	0.399775	-0.147233	0.56963	0.397361	-0.194105	0.485677	1	-0.130695	0.851318	-0.381458	0.127807	-0.120547	-0.699889	-0.681482	-0.60846	0.466938	0.109538	0.333893	-0.142223	0.0257296	-0.179815	0.258279	-0.00266032	0.214266	-0.888423	-0.407917	0.623288	0.853915	-0.310405	-0.0665326	0.466095	0.121722	0.306602	-0.708908	0.416447	0.307973	0.427315	-0.835272	0.669503	0.287674	0.335275	0.133165	0.209433	-0.750704	0.213603	0.142777
b-/g-tocotrienol	0.120873	0.176573	-0.722082	-0.280193	-0.212137	-0.708541	-0.45571	-0.0762878	0.40713	-0.130695	1	-0.401232	0.336389	-0.0229756	-0.108619	0.259903	0.289401	0.325047	0.25411	-0.406005	0.0529788	-0.428138	-0.0053797	0.0017229	0.422696	0.821329	-0.0210146	0.580917	0.38984	-0.576611	-0.0499854	0.409364	0.499692	0.747171	-0.462584	0.510922	0.910327	0.300053	0.718647	0.720661	0.770355	0.349919	0.707378	0.696798	-0.204835	0.218415	-0.0259981	-0.0165831	0.135653
d-tocopherol	-0.0705978	-0.742051	0.296164	0.359452	0.299798	0.588741	0.61087	-0.107632	-0.0848649	0.851318	-0.401232	1	-0.234207	0.240313	-0.487271	-0.48259	-0.960769	-0.0248109	-0.025017	0.350734	0.250757	-0.205926	-0.489568	0.159769	-0.394803	-0.502948	-0.0461065	-0.470916	-0.567081	0.670102	-0.444103	-0.407683	-0.306422	0.253181	0.594369	-0.0524853		-0.334637	-0.00394833	0.223188	-0.0371229	-0.252179	0.107838	0.216561	0.0379221	0.0767481	0.416854	-0.305776	-0.455121
plastoquinol-9	-0.337166	0.134212	-0.0187155	-0.100562	-0.428356	0.0720354	-0.0140709	-0.0561356	0.052834	-0.381458	0.336389	-0.234207	1	0.602019	0.747156	0.413508	0.979699	0.814482	0.409923	0.267058	0.667833	-0.475718	0.705108	0.704695	0.491896	-0.147743	0.429699	0.619348	0.597061	-0.25186	-0.112231	0.0989559	0.879769	0.28702	0.12729	0.647446	0.99004	0.308616	0.654236	0.260623	0.54472	0.0320402	0.17034	-0.405238	0.506192	0.877001	0.224233	-0.114506	0.236176
menaquinone-8	-0.214535	-0.462046	0.347573	-0.103863	-0.227912	0.243538	0.0315856	0.232592	0.39614	0.127807	-0.0229756	0.240313	0.602019	1	0.359618	-0.0884626	0.512042	0.401538	0.558456	0.731412	0.848925	-0.290198	0.502781	0.836706	0.141171	-0.323432	0.56613	0.358936	0.344209	0.354043	0.528325	0.368105	0.781669	0.188331	0.307631	0.369848	0.580216	0.365777	0.481083	0.17723	0.258439	0.386397	0.1658	-0.307237	0.688936	0.750648	-0.288649	0.370318	0.525383
phylloquinone	-0.584486	0.280347	0.10382	-0.323167	-0.497982	0.0989687	0.0819132	0.303715	-0.0501056	-0.120547	-0.108619	-0.487271	0.747156	0.359618	1	0.000178372	0.280436	-0.0157312	0.224311	0.24476	0.299608	-0.0614614	0.944322	0.200095	0.149521	-0.639185	0.235445	0.172652	-0.092233	0.178549	0.0637134	0.336663	0.126714	-0.489245	-0.0596064	-0.0438027	-0.374467	0.209205	-0.153177	-0.498032	-0.253105	0.154035	-0.47872	-0.549863	0.601967	0.576828	-0.102963	0.636492	0.623626
plastoquinone	-0.2285	0.490946	-0.154488	-0.3084	0.464191	-0.237655	-0.62841	-0.266443	-0.601902	-0.699889	0.259903	-0.48259	0.413508	-0.0884626	0.000178372	1	0.911171	0.780301	-0.599379	0.138018	-0.306307	0.310327	-0.190964	-0.067722	-0.132902	0.129495	-0.540375	0.940044	0.825216	-0.324887	-0.654177	0.22505	-0.466663	-0.845045	-0.385732	-0.716061	0.947215	-0.651344	-0.731608	-0.878606	0.710469	-0.719149	-0.927478	-0.84518	-0.491612	-0.538656	0.338945	-0.531509	-0.48287
ubiquinone-8	-0.355478	0.307552	-0.308485	0.207656	-0.0293832	-0.437046	-0.584319	0.644547	-0.543067	-0.681482	0.289401	-0.960769	0.979699	0.512042	0.280436	0.911171	1	0.970434	-0.272983	0.179078	0.297006	0.292937	0.532299	0.58176	-0.299359	0.147023	0.602933	1	0.869567	-0.21431	-0.545207	0.911877	-1	-1	-0.474471	-1	0.99004	-0.575484	-1	-1	1	-0.272901	-1	-1	-0.127297	-0.940558	0.341847	-0.173619	0.2576
ubiquinone-10	-0.289426	0.236118	-0.0477426	-0.287709	0.23839	-0.113463	-0.3749	-0.20345	-0.235884	-0.60846	0.325047	-0.0248109	0.814482	0.401538	-0.0157312	0.780301	0.970434	1	-0.129636	0.363799	0.253796	-0.183115	-0.108956	0.517848	0.0607611	0.0198286	-0.0974799	0.843328	0.817736	-0.298983	-0.411962	0.198477	0.497277	0.109643	0.0378027	0.125559	0.968346	-0.284738	0.293704	0.0611253	0.76236	-0.452107	-0.0521387	-0.462579	-0.0225044	0.52282	0.373848	-0.459162	-0.269306
ubiquinone-9	0.233524	-0.50229	0.0353154	0.205431	-0.750994	0.167863	0.380566	0.130908	0.804724	0.466938	0.25411	-0.025017	0.409923	0.558456	0.224311	-0.599379	-0.272983	-0.129636	1	0.0172882	0.836287	-0.661475	0.44232	0.556014	0.698359	0.106982	0.869672	-0.420981	-0.162801	0.0181473	0.669721	-0.0685698	0.970129	0.729929	0.26014	0.898008	0.975986	0.990974	0.942963	0.728975	-0.209276	0.855262	0.702782	0.229767	0.726015	0.9601	-0.369887	0.454351	0.665497
b-sitosterol	-0.183824	-0.447629	0.760671	-0.300457	0.380261	0.462238	-0.155681	-0.169408	0.051363	0.109538	-0.406005	0.350734	0.267058	0.731412	0.24476	0.138018	0.179078	0.363799	0.0172882	1	0.440967	0.0922854	0.232492	0.530926	-0.132987	-0.527919	0.012192	0.200026	0.335092	0.521276	0.410864	0.156784	-0.247979	-0.626533	0.420027	-0.621281	-0.0471405	-0.459961	-0.544142	-0.654498	-0.301633	-0.234772	-0.694735	-0.74642	0.349052	0.0837674	-0.362293	0.00279536	0.0935244
squalene	-0.03722	-0.513676	0.271159	0.174095	-0.531763	0.435646	0.381817	0.0585665	0.520991	0.333893	0.0529788	0.250757	0.667833	0.848925	0.299608	-0.306307	0.297006	0.253796	0.836287	0.440967	1	-0.604091	0.437848	0.777797	0.515252	-0.23214	0.765592	-0.0365279	0.102694	0.271747	0.61402	-0.0380727	0.941161	0.520045	0.407343	0.813878	0.608968	0.819686	0.823409	0.497974	-0.0924994	0.62385	0.409401	-0.154731	0.784034	0.964776	-0.264135	0.277516	0.472055
myristoleic acid	0.140756	0.0427226	0.149745	0.135209	0.464129	-0.0835917	-0.446469	0.179833	-0.513964	-0.142223	-0.428138	-0.205926	-0.475718	-0.290198	-0.0614614	0.310327	0.292937	-0.183115	-0.661475	0.0922854	-0.604091	1	-0.1121	-0.512805	-0.536892	0.0450438	-0.405945	0.0279681	0.252451	0.23747	-0.236575	0.242761	-0.734622	-0.719984	-0.515223	-0.641169	-0.123445	-0.717036	-0.831164	-0.669928	-0.00227285	-0.360459	-0.550756	-0.199836	-0.551766	-0.862671	-0.147357	-0.00190587	-0.194699
oxo-nonadecanoic acid	-0.44931	0.0816733	0.0498997	-0.254659	-0.622092	0.014106	0.0736494	0.456323	0.208535	0.0257296	-0.0053797	-0.489568	0.705108	0.502781	0.944322	-0.190964	0.532299	-0.108956	0.44232	0.232492	0.437848	-0.1121	1	0.303202	0.20087	-0.465337	0.443968	0.0195419	-0.0896235	0.200181	0.464365	0.462946	0.253449	-0.307367	-0.0906508	0.0878474	0.308076	0.37905	0.00409396	-0.303442	-0.187776	0.42498	-0.251233	-0.337595	0.692965	0.810251	-0.256814	0.819231	0.83275
hydroxy-octadecanoic acid	-0.210068	-0.22536	0.299925	-0.190355	-0.249408	0.0599405	0.104938	0.16611	0.421013	-0.179815	0.0017229	0.159769	0.704695	0.836706	0.200095	-0.067722	0.58176	0.517848	0.556014	0.530926	0.777797	-0.512805	0.303202	1	0.228815	-0.23349	0.637096	0.176699	0.243663	-0.0705738	0.238528	0.156302	0.827464	0.378788	0.577982	0.448175	0.92127	0.422757	0.58484	0.378461	0.207813	0.132351	0.375165	-0.126052	0.748204	0.804032	0.0980104	0.154878	0.425417
linoleic acid	0.464201	-0.274363	0.0639321	0.080084	-0.497275	0.167643	0.0695288	-0.443745	0.561455	0.258279	0.422696	-0.394803	0.491896	0.141171	0.149521	-0.132902	-0.299359	0.0607611	0.698359	-0.132987	0.515252	-0.536892	0.20087	0.228815	1	0.365837	0.479568	-0.22445	0.0863183	-0.335912	0.526626	-0.386626	0.941977	0.485544	0.0694998	0.768761	-0.927794	0.879053	0.795328	0.463275	-0.29719	0.54228	0.380449	-0.18743	0.317139	0.680163	-0.345386	-0.061335	0.248114
linolenic acid	0.769355	-0.152933	-0.461658	0.484457	0.045433	-0.626383	-0.649266	-0.188033	0.399211	-0.00266032	0.821329	-0.502948	-0.147743	-0.323432	-0.639185	0.129495	0.147023	0.0198286	0.106982	-0.527919	-0.23214	0.0450438	-0.465337	-0.23349	0.365837	1	0.00733099	-0.10022	0.430442	-0.730624	0.1032	0.046434	0.446233	0.863924	-0.487543	0.422985	0.86282	0.249236	0.585462	0.884543	0.657859	0.312552	0.927656	0.862474	-0.524094	-0.153364	-0.177463	-0.251411	-0.0890579
palmitic acid	0.150796	-0.376888	0.0791644	0.383385	-0.780049	0.117163	0.424511	0.422662	0.581034	0.214266	-0.0210146	-0.0461065	0.429699	0.56613	0.235445	-0.540375	0.602933	-0.0974799	0.869672	0.012192	0.765592	-0.405945	0.443968	0.637096	0.479568	0.00733099	1	-0.419214	-0.128413	0.0125101	0.426921	-0.0195094	0.886832	0.524091	0.254645	0.855862	0.816172	0.867943	0.759545	0.562854	-0.111738	0.733235	0.609839	0.145222	0.761332	0.812806	-0.125345	0.506784	0.679905
DG(19:0-22:3-0:0)	-0.72986	0.808353	-0.410163	-0.259854	0.184953	-0.228357	-0.460839	0.0155693	-0.613496	-0.888423	0.580917	-0.470916	0.619348	0.358936	0.172652	0.940044	1	0.843328	-0.420981	0.200026	-0.0365279	0.0279681	0.0195419	0.176699	-0.22445	-0.10022	-0.419214	1	0.90598	-0.232809	-0.889364	0.43523	-0.194615	-0.695603	-0.454517	-0.264326	1	-0.478484	-0.372208	-0.717238	0.88449	-0.544673	-0.745996	-0.727789	-0.308563	0.075566	0.856824	-0.322244	-0.346394
MGDG(18:3-18:3)	0.102234	-0.0222463	-0.068214	-0.16042	0.320813	-0.26728	-0.783889	-0.158686	-0.148749	-0.407917	0.38984	-0.567081	0.597061	0.344209	-0.092233	0.825216	0.869567	0.817736	-0.162801	0.335092	0.102694	0.252451	-0.0896235	0.243663	0.0863183	0.430442	-0.128413	0.90598	1	-0.214813	-0.179961	0.452628	0.347255	-0.225549	-0.411492	-0.0823041	0.852579	-0.453218	-0.0237615	-0.234621	0.851911	-0.248746	-0.270803	-0.757872	-0.302583	-0.264139	-0.061428	-0.337128	-0.168591
MGDG(18:2-18:3)	-0.159437	-0.506273	0.443642	0.352499	0.0707062	0.724451	0.403212	0.118132	-0.149003	0.623288	-0.576611	0.670102	-0.25186	0.354043	0.178549	-0.324887	-0.21431	-0.298983	0.0181473	0.521276	0.271747	0.23747	0.200181	-0.0705738	-0.335912	-0.730624	0.0125101	-0.232809	-0.214813	1	0.482354	-0.0245748	-0.714421	-0.571344	0.120029	-0.412903	-0.319069	-0.325475	-0.620071	-0.588174	-0.543669	0.220108	-0.650848	-0.349572	0.178915	-0.146512	-0.426002	0.267089	0.0208166
MGDG(18:1-16:2)	0.79739	-0.936903	0.506951	0.0976067	-0.17658	0.454139	0.141152	-0.335304	0.764904	0.853915	-0.0499854	-0.444103	-0.112231	0.528325	0.0637134	-0.654177	-0.545207	-0.411962	0.669721	0.410864	0.61402	-0.236575	0.464365	0.238528	0.526626	0.1032	0.426921	-0.889364	-0.179961	0.482354	1	-0.178243	0.716216	0.44861	0.365858	0.38856	-0.507604	0.650886	0.623195	0.397512	-0.888231	0.705168	0.30309	-0.0860795	0.507779	0.802476	-0.944175	0.526825	0.543084
cis-9-triolein(C18:1)	-0.38732	0.193994	-0.382449	-0.436283	-0.0320147	-0.621209	-0.549002	0.631417	0.0613147	-0.310405	0.409364	-0.407683	0.0989559	0.368105	0.336663	0.22505	0.911877	0.198477	-0.0685698	0.156784	-0.0380727	0.242761	0.462946	0.156302	-0.386626	0.046434	-0.0195094	0.43523	0.452628	-0.0245748	-0.178243	1	-0.254251	-0.135132	-0.483794	-0.34167	0.986525	-0.318479	-0.240951	-0.108998	0.937461	0.0995486	0.0324314	0.368934	0.0280275	-0.271978	-0.069983	0.573704	0.514446
neoxanthin-myristate	0.32035	-0.23416	-0.113061	0.13352	-0.707502	-0.0417033	0.332423	-0.0401705	0.711649	-0.0665326	0.499692	-0.306422	0.879769	0.781669	0.126714	-0.466663	-1	0.497277	0.970129	-0.247979	0.941161	-0.734622	0.253449	0.827464	0.941977	0.446233	0.886832	-0.194615	0.347255	-0.714421	0.716216	-0.254251	1	0.633708	0.357841	0.863704		0.963923	0.887983	0.635522	0.550694	0.649376	0.60687	0.0591321	0.819419	0.968275	0.288296	0.0901891	0.466014
violaxanthin-myristate	0.515901	-0.457349	-0.558815	0.26279	-0.407301	-0.282724	0.326764	0.0315473	0.751366	0.466095	0.747171	0.253181	0.28702	0.188331	-0.489245	-0.845045	-1	0.109643	0.729929	-0.626533	0.520045	-0.719984	-0.307367	0.378788	0.485544	0.863924	0.524091	-0.695603	-0.225549	-0.571344	0.44861	-0.135132	0.633708	1	0.137769	0.747779		0.684037	0.899574	0.996339	0.888826	0.744124	0.960703	0.738405	0.152895	0.63318	0.432528	-0.0647891	0.114811
9-cis-violaxanthin-myristate	-0.119651	-0.243877	0.618099	-0.128904	0.0667497	0.44341	0.50747	-0.244145	0.250014	0.121722	-0.462584	0.594369	0.12729	0.307631	-0.0596064	-0.385732	-0.474471	0.0378027	0.26014	0.420027	0.407343	-0.515223	-0.0906508	0.577982	0.0694998	-0.487543	0.254645	-0.454517	-0.411492	0.120029	0.365858	-0.483794	0.357841	0.137769	1	0.0499436	-0.999654	0.315514	0.209525	0.100988	-0.813033	-0.211445	-0.00353027	-0.36573	0.574648	0.581151	0.147659	-0.165303	-0.0215907
lutein-myristate	0.34853	-0.239059	-0.401343	0.542756	-0.807244	0.0646158	0.68336	0.130282	0.480601	0.306602	0.510922	-0.0524853	0.647446	0.369848	-0.0438027	-0.716061	-1	0.125559	0.898008	-0.621281	0.813878	-0.641169	0.0878474	0.448175	0.768761	0.422985	0.855862	-0.264326	-0.0823041	-0.412903	0.38856	-0.34167	0.863704	0.747779	0.0499436	1		0.92136	0.926473	0.755944	0.898284	0.838239	0.715993	0.278896	0.545047	0.841898	0.713706	0.0977842	0.275635
zeaxanthin-myristate	-0.669866	0.235505	-0.664554	0.890018	-0.334041	-0.625638	-0.768289	0.747933	-0.875879	-0.708908	0.910327		0.99004	0.580216	-0.374467	0.947215	0.99004	0.968346	0.975986	-0.0471405	0.608968	-0.123445	0.308076	0.92127	-0.927794	0.86282	0.816172	1	0.852579	-0.319069	-0.507604	0.986525			-0.999654		1	1			1	0.998973			-0.999923		0.293816	0.485852	0.97918
violaxanthin-dimyristate	0.360295	-0.355342	-0.0949802	0.226203	-0.831958	0.0853446	0.57778	0.0457682	0.748136	0.416447	0.300053	-0.334637	0.308616	0.365777	0.209205	-0.651344	-0.575484	-0.284738	0.990974	-0.459961	0.819686	-0.717036	0.37905	0.422757	0.879053	0.249236	0.867943	-0.478484	-0.453218	-0.325475	0.650886	-0.318479	0.963923	0.684037	0.315514	0.92136	1	1	0.925666	0.684804	-0.291487	0.859122	0.657704	0.180455	0.825816	0.960095	-0.325425	0.388139	0.604638
9-cis-violaxanthin-dimyristate	0.378203	-0.315174	-0.435767	0.273368	-0.674783	-0.113212	0.474827	0.000528296	0.736146	0.307973	0.718647	-0.00394833	0.654236	0.481083	-0.153177	-0.731608	-1	0.293704	0.942963	-0.544142	0.823409	-0.831164	0.00409396	0.58484	0.795328	0.585462	0.759545	-0.372208	-0.0237615	-0.620071	0.623195	-0.240951	0.887983	0.899574	0.209525	0.926473		0.925666	1	0.89304	0.772803	0.816977	0.841727	0.428742	0.53246	0.893914	0.473562	0.0327757	0.294441
violaxanthin-palmitate-myristate	0.550501	-0.461908	-0.566606	0.295283	-0.423704	-0.318932	0.310579	0.0944261	0.752461	0.427315	0.720661	0.223188	0.260623	0.17723	-0.498032	-0.878606	-1	0.0611253	0.728975	-0.654498	0.497974	-0.669928	-0.303442	0.378461	0.463275	0.884543	0.562854	-0.717238	-0.234621	-0.588174	0.397512	-0.108998	0.635522	0.996339	0.100988	0.755944		0.684804	0.89304	1	0.90739	0.759589	0.979531	0.759283	0.148758	0.611634	0.46326	-0.0288143	0.146751
zeaxanthin/lutein-dimyristate	-0.699738	0.909165	-0.868086	-0.0824996	-0.0262888	-0.939794	-0.556911	0.66609	-0.357651	-0.835272	0.770355	-0.0371229	0.54472	0.258439	-0.253105	0.710469	1	0.76236	-0.209276	-0.301633	-0.0924994	-0.00227285	-0.187776	0.207813	-0.29719	0.657859	-0.111738	0.88449	0.851911	-0.543669	-0.888231	0.937461	0.550694	0.888826	-0.813033	0.898284	1	-0.291487	0.772803	0.90739	1	-0.183772	0.923902	0.988583	-0.391299	0.484225	0.992672	-0.183275	-0.149875
antheraxanthin-dimyristate	0.415682	-0.528629	-0.216181	0.37451	-0.731013	0.0708407	0.354963	0.333817	0.707687	0.669503	0.349919	-0.252179	0.0320402	0.386397	0.154035	-0.719149	-0.272901	-0.452107	0.855262	-0.234772	0.62385	-0.360459	0.42498	0.132351	0.54228	0.312552	0.733235	-0.544673	-0.248746	0.220108	0.705168	0.0995486	0.649376	0.744124	-0.211445	0.838239	0.998973	0.859122	0.816977	0.759589	-0.183772	1	0.77684	0.588641	0.534841	0.671197	-0.575871	0.65654	0.672455
neoxanthin-dipalmitate	0.570688	-0.413054	-0.600381	0.280274	-0.440431	-0.465229	0.195831	0.256981	0.773731	0.287674	0.707378	0.107838	0.17034	0.1658	-0.47872	-0.927478	-1	-0.0521387	0.702782	-0.694735	0.409401	-0.550756	-0.251233	0.375165	0.380449	0.927656	0.609839	-0.745996	-0.270803	-0.650848	0.30309	0.0324314	0.60687	0.960703	-0.00353027	0.715993		0.657704	0.841727	0.979531	0.923902	0.77684	1	0.815203	0.142668	0.524418	0.461087	0.100817	0.264515
antheraxanthin-palmitate-myristate	0.339736	-0.182706	-0.778877	0.162806	-0.143398	-0.656694	-0.0329842	0.450853	0.493828	0.335275	0.696798	0.216561	-0.405238	-0.307237	-0.549863	-0.84518	-1	-0.462579	0.229767	-0.74642	-0.154731	-0.199836	-0.337595	-0.126052	-0.18743	0.862474	0.145222	-0.727789	-0.757872	-0.349572	-0.0860795	0.368934	0.0591321	0.738405	-0.36573	0.278896		0.180455	0.428742	0.759283	0.988583	0.588641	0.815203	1	-0.325392	-0.0284704	0.346388	0.224261	0.143737
lutein	-0.332899	-0.183579	0.322818	-0.0779606	-0.636062	0.274445	0.496502	0.311035	0.450973	0.133165	-0.204835	0.0379221	0.506192	0.688936	0.601967	-0.491612	-0.127297	-0.0225044	0.726015	0.349052	0.784034	-0.551766	0.692965	0.748204	0.317139	-0.524094	0.761332	-0.308563	-0.302583	0.178915	0.507779	0.0280275	0.819419	0.152895	0.574648	0.545047	-0.999923	0.825816	0.53246	0.148758	-0.391299	0.534841	0.142668	-0.325392	1	0.878515	-0.0587683	0.567046	0.707856
β-carotene	-0.238806	-0.488933	0.0347145	0.0889438	-0.814792	0.223041	0.563518	0.0844482	0.662286	0.209433	0.218415	0.0767481	0.877001	0.750648	0.576828	-0.538656	-0.940558	0.52282	0.9601	0.0837674	0.964776	-0.862671	0.810251	0.804032	0.680163	-0.153364	0.812806	0.075566	-0.264139	-0.146512	0.802476	-0.271978	0.968275	0.63318	0.581151	0.841898		0.960095	0.893914	0.611634	0.484225	0.671197	0.524418	-0.0284704	0.878515	1	0.399615	0.406498	0.630651
zeaxanthin	-0.536612	0.772757	-0.394387	-0.00791296	-0.0222044	-0.292969	0.219354	0.235421	-0.555421	-0.750704	-0.0259981	0.416854	0.224233	-0.288649	-0.102963	0.338945	0.341847	0.373848	-0.369887	-0.362293	-0.264135	-0.147357	-0.256814	0.0980104	-0.345386	-0.177463	-0.125345	0.856824	-0.061428	-0.426002	-0.944175	-0.069983	0.288296	0.432528	0.147659	0.713706	0.293816	-0.325425	0.473562	0.46326	0.992672	-0.575871	0.461087	0.346388	-0.0587683	0.399615	1	-0.288455	-0.350351
antheraxanthin	-0.281711	-0.062577	-0.138904	-0.0556244	-0.626919	-0.179278	0.152425	0.759232	0.358782	0.213603	-0.0165831	-0.305776	-0.114506	0.370318	0.636492	-0.531509	-0.173619	-0.459162	0.454351	0.00279536	0.277516	-0.00190587	0.819231	0.154878	-0.061335	-0.251411	0.506784	-0.322244	-0.337128	0.267089	0.526825	0.573704	0.0901891	-0.0647891	-0.165303	0.0977842	0.485852	0.388139	0.0327757	-0.0288143	-0.183275	0.65654	0.100817	0.224261	0.567046	0.406498	-0.288455	1	0.905045
9-cis-violaxanthin	-0.117473	-0.160549	-0.0255874	-0.191343	-0.665584	-0.235062	0.0232079	0.587737	0.613646	0.142777	0.135653	-0.455121	0.236176	0.525383	0.623626	-0.48287	0.2576	-0.269306	0.665497	0.0935244	0.472055	-0.194699	0.83275	0.425417	0.248114	-0.0890579	0.679905	-0.346394	-0.168591	0.0208166	0.543084	0.514446	0.466014	0.114811	-0.0215907	0.275635	0.97918	0.604638	0.294441	0.146751	-0.149875	0.672455	0.264515	0.143737	0.707856	0.630651	-0.350351	0.905045	1
violaxanthin	-0.171055	-0.0996335	-0.0592336	-0.126503	-0.629387	-0.20612	0.0415285	0.665164	0.450054	0.186795	0.0215208	-0.475503	0.00322322	0.391206	0.672439	-0.491269	-0.454221	-0.423975	0.510101	0.037414	0.305433	2.27634e-05	0.857177	0.203162	0.0895174	-0.16761	0.550565	-0.365766	-0.257183	0.158868	0.571402	0.549739	0.211527	-0.0837949	-0.163043	0.116958	-0.551757	0.453153	0.0673309	-0.0462382	-0.307116	0.638807	0.0881041	0.116886	0.591639	0.458479	-0.372838	0.974824	0.95968
luteoxanthin	-0.0154469	-0.211951	0.00786718	-0.144146	-0.67459	-0.249925	0.0347268	0.540672	0.69431	0.0892636	0.161517	-0.405848	0.316999	0.570507	0.502016	-0.479013	0.638684	-0.170252	0.747634	0.0896356	0.555798	-0.284457	0.72814	0.568419	0.342798	0.0105487	0.79319	-0.371938	-0.107895	-0.100616	0.470813	0.424639	0.638692	0.268982	0.087044	0.415812	0.868942	0.691628	0.452671	0.305164	-0.0900705	0.664095	0.417404	0.177938	0.747504	0.667321	-0.284059	0.797352	0.969585
neoxanthin	-0.246618	-0.310314	0.029702	-0.169687	-0.658344	0.0710602	0.157334	0.329545	0.666389	0.341196	0.269389	-0.167912	0.689734	0.839239	0.62244	-0.546294	-0.787035	0.124568	0.830588	0.333205	0.812805	-0.507221	0.79973	0.654136	0.422948	-0.220082	0.671994	0.348921	0.0395316	0.191823	0.792938	0.45176	0.692322	0.30968	0.121076	0.497431	-1	0.769089	0.574095	0.294952	0.313017	0.761615	0.293863	0.0150479	0.808946	0.936478	-0.42031	0.718465	0.850735
other carotenoids	-0.0296997	-0.21466	-0.257938	0.134055	-0.767384	0.218021	0.475873	0.0425546	0.500402	0.523533	0.540842	-0.230852	0.352407	0.350987	0.437309	-0.468672	-0.335894	-0.21324	0.787368	-0.195052	0.685918	-0.655944	0.559447	0.141124	0.686348	-0.109069	0.515959	-0.16247	-0.263502	0.163811	0.560696	-0.0204758	0.589937	0.482932	-0.084986	0.679553	0.793859	0.785624	0.688385	0.447023	-0.158932	0.805593	0.361812	0.138338	0.650542	0.839699	-0.378179	0.494978	0.522427
Alpha-Chaconine	0.622153	0.054122	-0.238683	-0.0155225	0.12651	-0.250731	-0.507024	-0.51778	0.0529085	0.0248455	0.472896	-0.591722	-0.138398	-0.571946	-0.22079	0.308131	-0.130136	-0.0790228	-0.142138	-0.453437	-0.423456	0.20913	-0.262289	-0.579206	0.479997	0.742056	-0.323942	-0.463875	0.270321	-0.477657	0.612995	-0.188667	0.844468	0.718948	-0.56858	0.695724	-0.874634	0.799959	0.841511	0.690572	-0.450293	0.442494	0.590683	0.0915555	-0.615835	-0.360715	-0.291194	-0.355964	-0.250322
Alpha-Solanine	0.60221	0.0779662	-0.253198	-0.0186903	0.144153	-0.26813	-0.5277	-0.493015	0.0161953	0.00436848	0.463401	-0.599871	-0.156879	-0.586094	-0.214058	0.331045	-0.108375	-0.0804009	-0.181914	-0.455788	-0.457582	0.252302	-0.259642	-0.605278	0.438554	0.735574	-0.35172	-0.531286	0.281503	-0.467573	0.600226	-0.158308	0.861542	0.807607	-0.60201	0.748904	-0.723506	0.833991	0.896787	0.787455	-0.418959	0.50618	0.705868	0.227913	-0.642582	-0.400217	-0.281055	-0.346959	-0.257464
Alpha-Solasonine	-0.414579	0.776222	-0.992729	0.580849	-0.946138	-0.803414	-0.918834	0.792861	-0.00599366	-0.878656	1	-1	0.590236	0.800416	-0.426606	0.46189	1	0.617607	0.384124	-0.818892	0.451506	-0.957178	-0.599445	0.990028	-0.503674	0.728647	0.589243	0.633002	1	-0.928417	-0.800416	0.919343	1	1	-0.998888	1	1	0.136649	1	1	1	0.330265	1	1	-0.884835	1	0.837533	0.209739	0.249982
Anguivioside XV	-0.424676	0.653072	-0.662259	-0.21408	0.17752	-0.649816	-0.636952	0.332333	-0.309538	-0.912242	0.699466	-0.422922	0.410706	0.297541	-0.181751	0.750513	1	0.739367	-0.320473	-0.0923901	-0.152882	0.0541174	-0.187672	0.253815	-0.337257	0.451423	-0.242732	0.826349	0.887416	-0.537649	-0.884081	0.652268	-0.00440405	0.418134	-0.560001	0.011592	1	-0.414982	0.154301	0.451395	0.982266	-0.35032	0.582607	0.875483	-0.438075	-0.119989	0.886217	-0.202352	-0.190122
Calystegine A3	0.199156	-0.210166	0.637035	-0.143387	0.700912	0.455349	-0.36099	-0.634209	-0.366424	0.114927	-0.414645	0.0278826	-0.189168	-0.120111	-0.0249775	0.410179	-0.154184	0.0868407	-0.52375	0.521626	-0.280903	0.541571	-0.199735	-0.326065	-0.0869839	-0.167714	-0.584963	0.0671483	0.286986	0.333197	0.158167	-0.246711	-0.581183	-0.777594	-0.0233796	-0.715081	-0.441079	-0.625439	-0.765129	-0.801328	-0.462899	-0.52292	-0.854774	-0.739738	-0.401868	-0.600088	-0.389483	-0.46254	-0.478257
Calystegine B1 or B2	0.600872	0.0397186	-0.274167	-0.0198966	0.243204	-0.24401	-0.532835	-0.546689	-0.00374148	0.0545286	0.494626	-0.475814	-0.209167	-0.595461	-0.313648	0.34999	-0.127908	-0.0540609	-0.234764	-0.431332	-0.480746	0.237538	-0.360445	-0.641592	0.372364	0.737827	-0.446059	0.233795	0.298817	-0.41193	0.190684	-0.160606	-0.312158	0.375376	-0.596559	-0.143596	0.563214	-0.291214	0.0611866	0.325621	0.375281	-0.0458572	0.209015	0.418942	-0.72414	-0.461394	-0.288839	-0.421017	-0.357127
Concinnoside D	0.0121617	-0.136534	0.810613	0.076988	-0.47687	0.238218	0.422284	-0.00278397	0.401298	-0.223568	-0.293749	0.115667	0.776883	0.466819	0.051674	-0.38439	-0.237761	0.607155	0.622079	0.316949	0.613665	-0.58148	0.0865251	0.850522	0.435296	-0.222404	0.759335	-0.310929	-0.140645	-0.292933	0.0570379	-0.415208	0.952333	0.517287	0.817095	0.780998		0.877112	0.827558	0.555943	-1	-0.032466	0.590118	-0.401666	0.704639	0.892343	0.319338	-0.0625939	0.252488
Hernariasaponin	0.270104	0.0983423	-0.227228	-0.246773	0.390715	-0.224809	-0.449639	-0.662612	0.0245354	-0.270766	0.637693	-0.0409011	0.427524	-0.158804	-0.492667	0.591971	0.46108	0.63862	-0.144065	-0.0968858	-0.0882312	-0.289685	-0.565835	0.0244836	0.331713	0.637449	-0.366249	0.589925	0.575004	-0.564537	-0.257042	-0.165315	0.3163	0.545402	-0.0745996	0.167857	0.995978	-0.123224	0.447269	0.490536	0.699378	-0.347301	0.358453	0.153352	-0.468278	0.0188735	0.148881	-0.765066	-0.547514
Pennogenin Tetraglycoside	0.224335	-0.160851	-0.447007	0.88303	-0.759549	0.312338	0.719783	0.254566	-0.0816275	0.568196	0.129799	0.186091	0.262398	-0.0926329	-0.152533	-0.404162	-0.106551	-0.314997	0.46	-0.5916	0.36279	-0.263375	-0.0538548	-0.0971919	0.338795	0.408021	0.489472	-0.158788	-0.473992	0.144653	-0.121935	-0.547775	0.42582	0.521399	-0.220432	0.813857		0.553601	0.606211	0.531792	0.979743	0.710076	0.462661	0.224426	0.107473	0.402433	0.851209	0.0977723	-0.0564609
N1,N10-bis(dihydrocaffeoyl)spermidine	0.112941	0.718759	-0.45145	-0.486211	0.207317	-0.791719	-0.469859	-0.412241	-0.0301666	-0.818509	0.628396	-0.767378	0.568462	-0.889232	-0.278772	0.672911	0.450717	0.531699	-0.584183	-0.574919	-0.988614	-0.534574	-0.385147	-0.470276	0.430709	0.734477	-0.643538	0.934392	0.0779748	-0.980949	-0.940316	-0.177197	-0.699029	-0.922944	-0.0950073	-0.855094	1	-0.498446	-0.821345	-0.920974	-1	-0.650795	-0.877685	-0.76351	-0.553484	-0.845574	0.483646	-0.476855	-0.36375
N-Caffeoylputrescine	0.211961	-0.312541	0.164653	-0.109981	-0.685032	0.028565	0.106722	-0.051214	0.73691	0.0968098	0.284801	-0.339938	0.644676	0.580329	0.618661	-0.276555	0.340356	0.190229	0.873414	0.146288	0.776583	-0.653267	0.911669	0.728497	0.798029	0.120766	0.781578	-0.191126	0.078146	-0.30388	0.477533	-0.0640841	0.949694	0.483626	0.36732	0.658685	0.999389	0.841334	0.75141	0.479126	-0.134334	0.548069	0.454521	-0.0923755	0.780378	0.889168	-0.231468	0.44908	0.796097
Feruloylputrescine	-0.00724924	-0.254173	0.232801	-0.105276	-0.547466	0.0410677	0.0692986	0.141679	0.574471	-0.0632942	0.136406	-0.23061	0.752854	0.757831	0.405567	-0.147038	0.896258	0.339074	0.773457	0.339313	0.82703	-0.502701	0.535383	0.869415	0.588981	-0.0512393	0.809739	-0.0208027	0.220092	-0.176644	0.361435	0.11379	0.903185	0.318792	0.347128	0.589821	0.909819	0.687274	0.625945	0.327233	0.0160236	0.406734	0.339636	-0.185011	0.799883	0.865693	-0.126853	0.32402	0.646597
Allantoin	-0.544568	0.00681639	0.187646	-0.761949	0.0914397	0.273086	0.0752841	0.350308	-0.297521	0.257165	-0.438358	0.13667	-0.460799	0.172786	0.570483	-0.124559	-0.220255	-0.346152	-0.259326	0.404861	-0.0980756	0.408539	0.522917	-0.245795	-0.546624	-0.6685	-0.279349	0.00403523	-0.22717	0.832542	0.147902	0.441835	-0.788174	-0.759477	-0.146649	-0.704047	-0.424385	-0.457492	-0.786155	-0.769025	-0.289022	0.0123578	-0.739543	-0.274566	0.113691	-0.546988	-0.283755	0.533484	0.2404
Spermidine	0.498362	-0.290218	0.0250862	0.218072	0.263472	-0.14148	-0.422478	-0.193768	0.0997599	-0.234214	0.249495	0.0556043	0.536938	0.228062	-0.560783	0.431129	0.901029	0.602454	0.0373058	0.137606	0.171174	0.0944128	-0.48432	0.338346	0.190947	0.599975	0.15449	0.303508	0.77315	-0.318654	-0.0547133	-0.0101843	0.417471	0.461323	-0.0961647	0.346794	0.924297	-0.115643	0.389124	0.492716	0.956143	-0.114201	0.509719	0.198188	-0.273766	0.138533	0.0267064	-0.507552	-0.276398
Tyramine	-0.886362	0.708122	-0.396351	-0.624995	-0.53317	-0.267105	0.376649	0.965301	-0.182764	-0.286547	-0.0310257	-0.299975	0.737994	0.244554	0.949668	-0.492482	-1	-0.794525	0.0899837	-0.0840663	0.0574081	0.068025	0.911361	-0.046337	-0.459322	-0.521796	0.160563	0.848317	-0.875601	0.445712	1	0.958131	-0.274941	-0.216066	-0.302252	-0.0960447		-0.0360282	-0.177755	-0.19654	1	0.42207	-0.0992469	0.553391	0.383957	0.759698	0.597631	0.949178	0.736851
Alanine	0.535302	0.162059	-0.433927	-0.0703804	0.252805	-0.52761	-0.687723	-0.278817	-0.034644	-0.15105	0.550895	-0.566263	-0.238279	-0.584487	-0.342867	0.41614	0.100036	-0.00849089	-0.320843	-0.495299	-0.591673	0.375872	-0.34735	-0.601424	0.180994	0.838097	-0.424118	0.287352	0.397746	-0.529087	-0.416247	0.102815	-0.346214	0.246854	-0.729929	-0.246829	0.927848	-0.45277	-0.115307	0.289935	0.937438	-0.146426	0.425305	0.800302	-0.776385	-0.544036	-0.163138	-0.303627	-0.25846
Arginine	0.714116	-0.414514	0.101816	0.0553523	-0.34706	-0.0154939	0.0509046	-0.333749	0.764874	0.46362	0.258214	-0.434853	-0.100148	#VALUE!	-0.10523	-0.519379	-0.71398	-0.439276	0.61245	-0.298283	0.192277	-0.355203	0.0282124	-0.0122566	0.776894	0.516448	0.401149	-0.786524	-0.289382	-0.334763	0.708238	-0.38768	0.923371	0.727861	0.121869	0.71275	-0.954184	0.853662	0.853262	0.731999	-0.622104	0.632338	0.72376	0.241564	0.177495	0.516622	-0.492581	0.0790423	0.322052
Asparagine	-0.387186	0.0518234	0.149073	0.0155336	-0.21761	0.0533306	0.379997	0.649452	-0.0512688	0.172471	-0.608686	0.101415	-0.61958	0.0252007	0.407953	-0.578262	-0.558015	-0.658043	-0.0278844	0.0506101	-0.113188	0.25587	0.457954	-0.0902691	-0.518786	-0.593725	0.150097	-0.543454	-0.70132	0.466781	0.0724139	0.235802	-0.573946	-0.578635	0.143794	-0.467958	-0.969589	-0.0360849	-0.623148	-0.533798	-0.72497	0.162374	-0.389737	0.0140282	0.37097	-0.209073	-0.0256514	0.718341	0.470441
Aspartate	0.546816	-0.062251	-0.212288	0.619503	0.200661	0.108482	-0.116852	-0.349671	-0.35332	0.0154108	0.133321	0.0305347	-0.0529003	-0.455766	-0.578825	0.378027	0.360567	0.131598	-0.271674	-0.377807	-0.279289	0.32548	-0.636545	-0.471405	0.148212	0.642702	-0.216455	0.206881	0.386953	-0.122889	-0.296018	-0.400427	-0.0315944	0.206924	-0.45833	0.336331	0.986949	-0.208063	0.133782	0.223672	0.385011	-0.124112	0.171401	0.0932421	-0.7	-0.384649	0.0567739	-0.62874	-0.660613
Glutamate	-0.489317	0.499516	-0.177652	-0.371372	0.0841447	-0.384242	-0.377225	0.501074	-0.424946	-0.349108	-0.132455	-0.483009	-0.421502	-0.156364	0.534395	0.238043	0.483567	-0.180384	-0.503477	0.00594288	-0.509738	0.622076	0.472068	-0.362522	-0.555334	-0.31035	-0.36229	0.234585	0.0145513	0.10591	-0.570073	0.657017	-0.597724	-0.695258	-0.509316	-0.616328	0.740348	-0.488398	-0.70277	-0.670986	0.326192	-0.233834	-0.552073	-0.149003	-0.150863	-0.911651	0.0353684	0.495457	0.271729
Glutamine	-0.177926	-0.447559	0.472482	0.220506	-0.171116	0.524769	0.621528	0.125275	0.263608	0.256828	-0.425059	0.700355	0.289234	0.65509	-0.0192699	-0.446957	-0.0448947	0.111898	0.471353	0.501134	0.717618	-0.465982	0.0610874	0.733916	-0.0156309	-0.534187	0.552872	-0.381635	-0.230956	0.420286	0.779997	-0.231397	0.608044	0.482775	0.800671	0.540634	-0.539498	0.508731	0.57233	0.466897	-0.682477	0.283472	0.362093	-0.113105	0.69267	0.642367	0.069928	0.0884968	0.155769
Glycine-Betaine	-0.314715	-0.311896	0.284218	0.188126	-0.57823	0.319986	0.554351	0.523863	0.34314	0.194845	-0.3248	0.271712	0.392195	0.764055	0.429166	-0.521959	0.168662	-0.0353957	0.658029	0.3874	0.788408	-0.366018	0.571293	0.735643	0.0653509	-0.541766	0.80354	-0.415509	-0.23731	0.395711	0.576352	0.120334	0.839726	0.270597	0.488548	0.751834	0.455113	0.86143	0.613126	0.300843	-0.278804	0.752805	0.34099	-0.121637	0.906409	0.736792	-0.0354455	0.59673	0.64019
Histidine	-0.162284	-0.189384	0.248858	0.339709	-0.616141	0.326841	0.781339	0.485493	0.270751	0.315731	-0.520163	0.273348	-0.0703418	0.24991	0.317482	-0.802444	-0.550173	-0.527881	0.52728	-0.00838625	0.425205	-0.2671	0.417025	0.322952	0.0295221	-0.536126	0.692913	-0.813215	-0.724616	0.330021	0.359536	-0.203777	0.582727	0.174319	0.509131	0.701651	-0.866005	0.726788	0.440736	0.225659	-0.667332	0.557081	0.295298	-0.0173613	0.756457	0.620395	0.0345943	0.582489	0.528954
Isoleucine or Leucine	-0.505704	0.0821988	0.286484	0.16043	-0.608265	0.362178	0.657173	0.4719	-0.0186006	-0.0314159	-0.533356	0.0666276	0.369202	0.426687	0.639134	-0.392414	-0.0191251	-0.123894	0.397468	0.204792	0.512223	-0.238493	0.63189	0.489417	0.0260001	-0.778658	0.621434	-0.259548	-0.432293	0.298036	0.0117588	-0.0690059	0.460418	-0.272011	0.460643	0.403204	-0.85949	0.547335	0.142885	-0.25142	-0.633451	0.232317	-0.228229	-0.555607	0.84717	0.673288	0.219286	0.524609	0.501548
Lysine	-0.321496	-0.255327	0.280977	-0.122386	-0.44107	0.251448	0.584371	0.341787	0.482016	0.401032	-0.295624	0.326083	-0.0528829	0.452394	0.414674	-0.775493	-0.582607	-0.41214	0.55977	0.253409	0.506821	-0.47693	0.531091	0.440225	0.00704285	-0.581905	0.501704	-0.722475	-0.671594	0.376116	0.716252	0.035429	0.481384	0.255507	0.607737	0.249144	-0.984728	0.66717	0.418908	0.230106	-0.799356	0.610684	0.231447	0.103965	0.822757	0.646071	-0.160017	0.64369	0.629445
Methionine	0.211595	-0.587251	0.395525	0.295549	-0.489778	0.309529	0.488825	0.21084	0.649566	0.356049	-0.243014	0.293807	0.281792	0.619071	0.0424007	-0.65059	-0.261793	-0.120127	0.805461	0.263138	0.780344	-0.455104	0.237722	0.726414	0.37112	-0.125342	0.890589	-0.645863	-0.244797	0.1563	0.679958	-0.197306	0.883577	0.581568	0.606897	0.751644	-0.901119	0.820737	0.747125	0.610032	-0.457349	0.627581	0.62579	0.0990489	0.779307	0.809244	-0.193354	0.328031	0.521497
Oxoproline	-0.243671	-0.311511	0.243037	0.0518883	0.34283	0.307079	0.197598	-0.0155869	-0.0384415	0.0416989	-0.171035	0.93134	0.240566	0.540555	-0.344427	0.0523	0.304994	0.475271	-0.00134026	0.561076	0.398457	-0.245499	-0.315235	0.536379	-0.360816	-0.349839	0.0211877	0.445478	0.202705	0.37706	0.0469748	0.0182968	-0.155011	0.319747	0.508652	-0.111239	0.701058	-0.437691	0.0668864	0.282503	0.704526	-0.281897	0.169983	0.186345	0.152397	0.258756	0.181551	-0.271814	-0.276696
Phenylalanine	0.174728	-0.460651	0.339587	0.098139	-0.461409	0.073261	0.359646	0.308697	0.707065	0.225985	-0.220136	0.135466	0.175759	0.540188	0.0763488	-0.671603	-0.385038	-0.188608	0.742993	0.196405	0.630773	-0.412116	0.283778	0.713601	0.291698	-0.0716253	0.847535	-0.696323	-0.330684	-0.00563136	0.570579	-0.0608721	0.797406	0.514901	0.595281	0.569654	-0.911151	0.756421	0.630713	0.554109	-0.448781	0.550705	0.625883	0.197805	0.774539	0.71286	-0.145531	0.427702	0.635044
Proline	-0.115412	-0.414511	0.802356	-0.234073	0.327544	0.579584	0.287205	-0.371715	0.179552	0.232396	-0.514688	0.600787	0.0893412	0.451008	-0.0121246	-0.222054	-0.362166	0.127366	0.118293	0.739644	0.403976	-0.305178	-0.0575578	0.521637	-0.0340085	-0.580711	0.0503022	-0.265828	-0.189174	0.37372	0.522853	-0.346093	-0.0223066	-0.1965	0.895647	-0.330778	-0.755626	-0.0501493	-0.175706	-0.24216	-0.739196	-0.293479	-0.347763	-0.518969	0.453734	0.300602	-0.120632	-0.200375	-0.0864764
Threonine	-0.720051	0.352086	0.000730242	-0.198044	-0.521382	0.0475472	0.290723	0.609569	-0.0479392	-0.00197945	-0.237516	-0.240724	0.280143	0.392895	0.887459	-0.278784	0.0512561	-0.271094	0.209016	0.175194	0.244711	-0.0127981	0.924118	0.137443	-0.175693	-0.698437	0.273629	-0.00971686	-0.413552	0.407962	0.544129	0.461562	-0.0799835	-0.464518	-0.017228	-0.117287	-1	0.166213	-0.242429	-0.458846	-0.774163	0.281167	-0.397872	-0.279817	0.616016	0.547967	-0.0564319	0.859773	0.716039
Tryptophan	-0.0765676	-0.419784	0.35692	0.137117	-0.569329	0.264922	0.522629	0.481235	0.532403	0.430889	-0.407252	0.149835	-0.0140959	0.523063	0.419235	-0.806856	-0.580519	-0.477038	0.669683	0.245039	0.577709	-0.244781	0.59726	0.466634	0.109842	-0.423308	0.750494	-0.833605	-0.550924	0.393006	0.745043	0.0524662	0.641491	0.140335	0.44892	0.503549	-0.989116	0.728889	0.398998	0.190687	-0.726008	0.733688	0.306804	0.00881286	0.839198	0.646828	-0.299563	0.746783	0.767211
Tyrosine	-0.224218	-0.101691	0.178493	0.0244661	-0.695377	0.0901224	0.571912	0.49065	0.474194	0.159635	-0.270043	-0.0164578	0.144749	0.390425	0.475785	-0.720248	-0.469882	-0.368868	0.662074	0.0327277	0.519755	-0.434116	0.601801	0.52045	0.190827	-0.401537	0.763292	-0.649377	-0.597468	0.0828636	0.386246	-0.00125078	0.766832	0.259562	0.506802	0.596107	-0.721821	0.841023	0.547065	0.290979	-0.515939	0.578317	0.368272	0.0113789	0.894064	0.799931	0.0121983	0.683855	0.750913
Valine	-0.408025	-0.260538	0.243559	0.287463	-0.527805	0.407938	0.670582	0.54843	0.174466	0.227266	-0.411671	0.416703	0.293345	0.677655	0.38506	-0.521331	0.104905	-0.081399	0.534582	0.351069	0.707597	-0.314165	0.494682	0.613501	-0.0874582	-0.67603	0.69359	-0.37249	-0.3179	0.528404	0.517828	0.0728911	0.641398	0.200933	0.473072	0.779363	0.320143	0.770296	0.524518	0.227536	-0.307207	0.782768	0.237739	-0.119676	0.823023	0.63749	0.0480197	0.554588	0.503647
Coumarin	0.237593	0.0812613	-0.0931111	-0.269527	-0.383694	-0.393848	0.144599	-0.0220339	0.635566	-0.114237	0.302974	-0.3771	0.114799	-0.0729232	-0.0450757	-0.430643	-0.492047	-0.132827	0.512381	-0.382922	0.180545	-0.634871	0.0491062	0.469133	0.526185	0.521279	0.474503	-0.477197	-0.396633	-0.756628	0.122313	-0.186122	0.801196	0.645578	0.548296	0.514937	-0.367065	0.77448	0.721504	0.652859	-0.236073	0.220572	0.683773	0.318956	0.546145	0.720302	0.16815	0.112477	0.391575
Adenine	0.281297	0.328999	-0.498238	-0.000667894	0.177307	-0.357792	-0.582576	-0.305231	-0.310144	-0.249881	0.570398	-0.56321	0.0110745	-0.525013	-0.160182	0.6363	0.312007	0.20318	-0.384014	-0.449412	-0.498975	0.333745	-0.248886	-0.602166	0.187602	0.624269	-0.483054	0.900645	0.527938	-0.418883	-0.690913	0.0809363	-0.446563	-0.143017	-0.803906	-0.0474986	0.995586	-0.501892	-0.197865	-0.154991	0.931133	-0.302502	-0.17935	0.169656	-0.752986	-0.477786	-0.0185475	-0.372107	-0.378512
Adenosine	-0.0242175	-0.0128492	-0.402792	0.706755	0.00215433	0.135523	0.347424	0.221175	-0.389935	0.0374527	0.0110371	0.636896	-0.0199642	-0.0937404	-0.520228	0.079252	0.617951	0.148342	-0.144361	-0.271387	-0.00225738	0.0486385	-0.499427	-0.136397	-0.33609	0.136529	-0.00484646	0.299391	0.101576	0.235016	-0.363618	-0.112962	-0.130962	0.398193	-0.18522	0.354366	0.941757	-0.212692	0.215017	0.409452	0.559722	0.0168306	0.367681	0.469791	-0.330049	-0.0683043	0.389339	-0.273985	-0.48008
Guanine	-0.288753	-0.1108	0.340325	0.032139	0.454689	0.243516	-0.180481	0.0718434	-0.62651	-0.367919	-0.272239	0.621948	0.774697	0.688366	-0.0861155	0.562681	0.749094	0.771	-0.392692	0.680289	0.476163	0.258525	-0.129697	0.828561	-0.638699	-0.30786	0.0291909	0.696449	0.632796	0.248441	-0.223136	0.224708	-0.705229	-0.518638	0.214646	-0.491302	0.711042	-0.88677	-0.636025	-0.514232	0.711017	-0.519186	-0.563658	-0.691011	0.0940016	0.0114787	0.241021	-0.303128	-0.305316
Guanosine	0.193833	-0.164537	-0.257796	0.700154	-0.245348	-0.0170726	-0.0213554	0.439741	-0.359351	-0.120546	0.038311	0.0853188	0.459612	0.273312	-0.239994	0.241453	0.977598	0.297665	0.149591	-0.0856549	0.339747	0.411614	-0.127415	0.192261	-0.116147	0.383096	0.621783	0.279676	0.505212	0.0971209	-0.20009	0.195032	0.570827	0.266959	-0.473696	0.743283	0.987892	-0.0434748	0.359476	0.339757	0.683913	0.210007	0.431958	0.29957	-0.201698	0.101227	0.126692	-0.0110412	-0.0615926
Aconitic Acid	0.445874	0.0082233	-0.320245	0.095532	0.322595	-0.262745	-0.68664	-0.291013	-0.208408	-0.109283	0.470551	-0.443605	-0.00235539	-0.292949	-0.302374	0.621033	0.434818	0.264397	-0.338765	-0.194384	-0.365936	0.467162	-0.320333	-0.474621	0.121397	0.673576	-0.408551	0.76476	0.6992	-0.228922	-0.206451	0.164348	-0.694779	-0.113876	-0.789921	-0.312075	0.863488	-0.685022	-0.428021	-0.0857371	0.852582	-0.132815	-0.0495509	0.350109	-0.769467	-0.6118	-0.22939	-0.380802	-0.36646
Anthranilic Acid	0.578676	-0.795616	0.351296	0.249256	-0.256771	0.351786	0.326239	-0.269517	0.821365	0.645114	0.0588159	0.407975	0.122405	0.40052	-0.274471	-0.620212	-0.660791	-0.167362	0.789448	0.165459	0.666216	-0.558667	-0.0791506	0.453702	0.600586	0.244246	0.612611	-0.661494	-0.181469	0.0865251	0.897379	-0.401234	0.753443	0.782497	0.513111	0.655759	-0.757345	0.729976	0.801081	0.771418	-0.583321	0.60563	0.701509	0.256952	0.438957	0.966012	-0.477301	0.0112756	0.249377
Chlorogenic Acid	0.751115	-0.39389	0.379963	0.460027	0.170303	0.456799	0.227087	-0.650295	0.0834684	0.429886	-0.277567	0.199474	-0.384215	-0.463751	-0.497943	-0.226737	-0.770021	-0.350267	0.0213582	-0.199656	-0.13514	0.0508837	-0.549015	-0.35001	0.406262	0.3228	-0.0394255	-0.635144	-0.255747	-0.0185969	0.444361	-0.874896	0.137636	0.13042	0.208036	0.229456	-0.993618	0.251875	0.133333	0.128222	-0.914393	0.0155742	0.0398583	-0.227211	-0.281958	-0.197936	-0.238938	-0.542299	-0.4653
Cinnamic Acid	0.5771	-0.355305	0.112357	-0.0847248	-0.657138	-0.190361	0.0510565	0.132855	0.860621	0.165872	0.260836	-0.874121	0.286586	0.441649	0.335702	-0.529259	-0.664976	-0.161248	0.841501	-0.0618165	0.603111	-0.499058	0.78005	0.708955	0.749306	0.563198	0.834885	-0.513073	-0.13824	-0.436314	0.519695	-0.0136452	0.868818	0.536046	0.410416	0.591	-0.465856	0.83813	0.6986	0.560846	-0.27697	0.624392	0.610385	0.156128	0.869674	0.755733	-0.321467	0.739129	0.945873
Citric Acid	0.538881	-0.354005	0.0888399	0.500453	0.216765	0.212037	-0.249488	-0.0913193	-0.222006	0.374812	-0.174834	-0.13361	-0.417035	-0.272369	-0.19207	0.0890252	0.0175618	-0.330221	-0.262482	-0.0539352	-0.31205	0.749088	-0.170113	-0.629403	-0.0604301	0.357044	-0.212225	-0.245419	0.216114	0.370315	0.250172	-0.0501699	-0.599655	-0.457417	-0.621898	-0.270741	-0.0539024	-0.417162	-0.555085	-0.41542	-0.230039	0.166321	-0.362271	-0.102385	-0.566748	-0.745354	-0.521295	-0.0619811	-0.215799
Coumaric Acid	0.00581518	-0.22165	0.192527	-0.07297	-0.577021	0.0397018	0.4551	0.16261	0.697998	0.14122	-0.0123075	0.0512779	0.306689	0.428058	0.197775	-0.626365	-0.514239	-0.122559	0.784805	0.0456739	0.635224	-0.710292	0.338407	0.697185	0.454614	-0.121521	0.770942	-0.525491	-0.419002	-0.186398	0.429537	-0.163573	0.938072	0.60616	0.666915	0.675272	-0.584006	0.898279	0.799436	0.610083	-0.356087	0.490166	0.613985	0.128261	0.839284	0.898119	0.0121984	0.36127	0.597071
p-Coumaroylquinic Acid	-0.835649	0.972115	-0.614666	-0.134866	-0.0273137	-0.422583	0.458955	0.253128	-0.606143	-0.720907	0.0389015	0.764008	-0.285679	-0.94257	-0.285976	0.288548	0.27462	-0.288868	-0.499191	-0.816833	-0.675644	-0.0738096	-0.641758	-0.575778	-0.401174	-0.113582	-0.397032	-0.709125	-0.970605	-0.569398	-0.949569	-0.262067	-0.45401	0.369485	-0.0512214	-0.198837	1	-0.287667	-0.0123231	0.33802	-1	-0.520879	0.289421	0.704971	-0.418191	-0.353604	0.961175	-0.399478	-0.510406
Ferulic Acid	0.0532165	-0.0103558	0.585811	0.0556961	-0.258646	0.619943	0.593499	-0.624476	0.00589036	0.160841	-0.553682	-0.202871	0.143289	-0.143435	0.653078	-0.258691	-0.743652	-0.22189	0.217475	0.0770393	0.229395	-0.30018	0.358856	0.0791439	0.541108	-0.653931	0.190866	-0.402349	-0.578049	0.035718	0.200366	-0.884419	0.391357	-0.346672	0.850233	0.204275	-0.999285	0.457217	0.0700332	-0.378723	-0.930311	-0.0712145	-0.479404	-0.880656	0.593044	0.474088	-0.0158913	-0.274663	-0.0443027
Feruloylquinic Acid	-0.0224197	-0.0789999	-0.127068	0.848873	-0.322823	0.435174	0.756675	0.335559	-0.321162	0.370125	-0.451808	0.479731	-0.322309	-0.239706	-0.139534	-0.437352	-0.558347	-0.490568	0.0214588	-0.35342	-0.00854515	0.122096	-0.131073	-0.33564	-0.243477	-0.62632	0.195061	-0.27958	-0.535121	0.504938	-0.0775658	-0.363963	-0.165682	0.0755348	-0.0347821	0.324603	-0.575104	0.101199	0.0419893	0.0982106	-0.155345	0.26281	0.0814912	0.169719	-0.0112061	-0.023957	0.175794	0.125044	-0.171551
Homogentisic Acid/Vanillic Acid	-0.722941	0.397071	-0.236712	-0.0678425	-0.044812	-0.252411	-0.112319	0.663127	-0.497941	-0.586843	-0.0204111	0.0987928	0.539541	0.456367	0.291828	0.470462	0.868781	0.597798	-0.20264	0.267726	0.149761	0.157386	0.262412	0.40601	-0.544572	-0.378432	0.0713507	0.946394	0.443824	0.105368	-0.678341	0.699924	-0.27614	-0.498474	-0.154447	-0.160518	0.99972	-0.501607	-0.38161	-0.461091	0.958406	-0.31057	-0.354881	-0.126834	0.155713	0.29699	0.502303	0.214982	0.115527
2-Hydroxyglutaric Acid	-0.463866	0.0597104	0.124976	0.336879	-0.0104465	0.295646	0.175167	0.554675	-0.587292	-0.0520217	-0.56651	0.198781	-0.0554215	0.237895	0.345606	0.0996157	0.591222	-0.0344516	-0.300315	0.312936	-0.000473547	0.573984	0.307237	-0.0683545	-0.607772	-0.703704	-0.000292251	0.32751	0.0601667	0.679065	-0.29269	0.313151	-0.588679	-0.69427	-0.220808	-0.338037	0.442106	-0.54649	-0.65179	-0.660321	0.221957	-0.130345	-0.596599	-0.318791	0.0638108	-0.341372	0.0777835	0.341165	0.0509964
Methylcitric Acid	0.170024	0.129825	-0.351778	-0.30758	0.0144593	-0.513602	-0.467371	-0.224955	0.306309	-0.449086	0.749757	-0.300372	0.6578	0.164968	-0.276881	0.452148	0.72661	0.702555	0.199758	-0.108982	0.18583	-0.429581	-0.227029	0.42888	0.416068	0.681038	0.100739	0.458432	0.619323	-0.749927	-0.189479	0.159582	0.7398	0.743037	-0.056248	0.484209	0.949532	0.180866	0.750141	0.729502	0.673367	-0.0592112	0.706293	0.35809	-0.082814	0.460163	0.221739	-0.365789	-0.0494787
Pipecolic Acid	-0.506625	0.494693	-0.144606	-0.483317	0.138067	-0.546508	-0.190643	0.363738	-0.104702	-0.774808	0.0557098	-0.0132625	0.281077	0.192701	-0.00847331	0.280088	0.532589	0.501127	-0.197452	0.103948	-0.0638501	-0.144242	-0.0275907	0.538285	-0.397555	-0.152293	0.0178694	0.518383	0.183033	-0.457837	-0.669616	0.393109	0.13735	0.0995087	0.303314	-0.235255	0.609244	-0.296854	0.00368767	0.125744	0.766988	-0.553248	0.246678	0.252589	0.191101	0.211175	0.683084	-0.0153616	0.0792695
Cysteinylglycine	-0.328494	0.488577	-0.356958	-0.260833	0.155647	-0.271301	0.278217	-0.0200401	-0.147017	-0.156524	0.077899	0.456227	-0.415165	-0.542372	-0.27081	-0.17037	-0.521225	-0.210547	-0.312852	-0.449631	-0.464064	-0.321208	-0.36051	-0.265485	-0.36243	-0.114276	-0.412755	-0.235468	-0.581931	-0.254007	-0.409085	-0.162453	-0.392128	0.326848	0.278737	-0.257768	-0.393852	-0.132516	-0.00450551	0.283502	0.0967242	-0.304336	0.22684	0.597065	-0.172737	-0.1929	0.548857	-0.169918	-0.308185
Glutathione	-0.569709	0.314508	0.0230794	-0.0602617	-0.125159	0.198794	0.4481	0.333977	-0.352297	0.15217	-0.477697	0.120464	-0.631701	-0.245202	0.473562	-0.350906	-0.740129	-0.580491	-0.252152	-0.0713295	-0.281048	0.158398	0.375613	-0.389205	-0.478095	-0.699168	-0.225693	-0.225235	-0.719433	0.476782	-0.181362	0.0426559	-0.673763	-0.641199	0.0599607	-0.496535	-0.949771	-0.161042	-0.635351	-0.651884	-0.62862	-0.0548591	-0.638693	-0.221859	0.163579	-0.435002	0.0949064	0.46196	0.136812
Glutathione Oxidized	-0.349241	0.0385543	-0.0830285	-0.31938	-0.416652	-0.289041	-0.0846698	0.35234	0.407487	-0.381984	0.352295	-0.116672	0.768829	0.734328	0.509591	0.0912994	0.809823	0.633724	0.527975	0.27695	0.652107	-0.543447	0.753873	0.916977	0.253421	-0.0601333	0.580906	0.390028	0.383895	-0.345685	-0.0194012	0.470638	0.846245	0.544102	0.299909	0.51434	0.985178	0.391122	0.695767	0.546203	0.512824	0.19277	0.560517	0.125573	0.669497	0.826117	0.217232	0.405271	0.652301
Glycerophosphocholine	-0.0288965	0.228095	-0.34717	-0.18649	-0.209194	-0.211969	-0.388645	0.0254023	-0.0784971	0.0675144	0.399903	-0.745682	-0.0773295	-0.216747	0.510825	0.214015	0.0175763	-0.197293	-0.0706272	-0.235265	-0.243162	0.280828	0.485538	-0.534214	0.200913	0.17017	-0.243436	0.21935	0.153476	-0.0165374	0.231991	0.371115	-0.213797	-0.406233	-0.772247	-0.171387	0.656346	-0.00049426	-0.259811	-0.415653	0.778508	0.32177	-0.384722	-0.163844	-0.235712	-0.431615	-0.394039	0.351407	0.260948
Phosphocholine	-0.0380371	-0.152592	0.137411	-0.279396	0.434859	0.143407	0.119935	-0.51263	0.172002	0.0790359	0.142672	0.660388	0.0690836	0.0932418	-0.49451	0.00761875	-0.341677	0.337057	-0.0143983	0.232018	0.140275	-0.570228	-0.531867	0.288182	-0.0271644	-0.0510943	-0.25489	0.141417	-0.0390823	-0.0643048	0.113268	-0.299743	0.0286887	0.409223	0.620329	-0.0683812	-0.926043	-0.0888085	0.220597	0.350245	-0.0200488	-0.281111	0.218721	0.180128	-0.0239804	0.258901	0.174368	-0.551589	-0.446614
Conduritol-β-epoxide	-0.252886	-0.0844344	-0.0261563	0.120024	-0.309181	0.192491	0.183335	0.532141	-0.0855327	0.494363	-0.26463	-0.101947	-0.695982	0.0431318	0.6268	-0.40811	-0.555202	-0.640699	0.0336893	0.0280987	-0.0518329	0.446421	0.638951	-0.389648	-0.272012	-0.434421	0.0249309	-0.310835	-0.367216	0.652557	0.393503	0.402552	-0.596214	-0.481848	-0.383409	-0.385692	-0.641526	-0.0403822	-0.494007	-0.456709	-0.507844	0.437463	-0.373831	0.204448	0.144321	-0.633953	-0.452383	0.791283	0.504715
Fructose-6P/Glucose-6P/Inositol-6P	0.454926	0.114932	-0.0504934	0.0409404	0.228485	-0.0453546	-0.47195	-0.464846	-0.262708	-0.00150615	0.147818	-0.576201	-0.207525	-0.582704	-0.0322381	0.407155	-0.101329	-0.126036	-0.373062	-0.282222	-0.523772	0.508044	-0.151296	-0.706068	0.268144	0.451566	-0.457059	0.070426	0.265485	-0.204444	-0.110953	-0.183053	-0.534384	-0.901249	-0.618343	-0.481362	-0.589392	-0.452526	-0.750235	-0.896325	-0.474965	-0.352139	-0.897725	-0.76515	-0.641961	-0.561893	-0.298961	-0.315537	-0.31954
Fructose/Galactose/Glucose/Inosositol/Mannose	-0.891841	0.982602	-0.681505	-0.445422	-0.715666	-0.983028	-0.269014	0.749045	0.905379	-0.646013	0.927136	-0.973297	-1	0.499764	0.912378	-0.176049		-0.449222	0.548665	-0.363981	0.189249	-0.92569	0.977684	-0.200386	0.563846	1	0.263672	0.74418	-0.563846	-1	-1	0.993086	0.316178	-0.0798367	-0.784427	0.0699468		0.542938	0.13159	-0.0747662	1	0.539324	0.0247247	0.225062	0.97027	1	-0.0469725	0.97218	0.996626
Raffinose/Melezitose	0.230263	0.179618	-0.424148	0.0392415	0.213782	-0.0781287	-0.385521	-0.488707	-0.290545	0.0214391	0.606478	-0.27476	-0.0148007	-0.467893	-0.179563	0.534097	0.112304	0.167935	-0.321812	-0.343384	-0.367824	0.152496	-0.287233	-0.638644	0.217971	0.478631	-0.56639	0.82396	0.442275	-0.169133	-0.234342	-0.0670318	-0.327	0.0250074	-0.672588	-0.0318187	0.94711	-0.361855	-0.0398714	-0.0359202	0.786503	-0.110356	-0.182413	0.0211544	-0.718538	-0.403219	-0.132497	-0.441306	-0.495655
Sucrose/Maltose/Isomaltose/Trehalose	0.352125	0.221424	-0.397871	0.333838	0.108516	-0.175743	-0.413751	-0.183967	-0.429925	-0.196034	0.319799	-0.44814	0.00414232	-0.4903	-0.208842	0.572798	0.416362	0.143587	-0.371739	-0.433921	-0.434623	0.491732	-0.287339	-0.59427	0.129812	0.591163	-0.325358	0.604715	0.518841	-0.249279	-0.537049	-0.0334524	-0.226562	-0.18202	-0.802083	0.194999	0.99696	-0.390313	-0.149399	-0.145579	0.71063	-0.172994	-0.126289	-0.0420268	-0.72605	-0.484285	0.0102309	-0.365523	-0.418807
Ascorbic Acid	-0.265063	-0.0700235	0.889169	0.13271	0.455535	0.792316	0.140295	-0.508813	-0.918247	-0.207223	-0.964047	0.039057	0.580387	0.0421637	0.871535	0.793525	1	0.391676	-0.839053	0.681252	-0.0850609	0.593484	0.437335	-0.219227	-0.0624285	-1	-0.332682	0.98718	0.878922	0.762417	-0.409733	-0.695768	-0.732893	-0.911027	0.525307	-0.431017		-0.716385	-0.791406	-0.912407	-1	-0.769113	-0.921731	-0.965907	0.500701	-0.543356	-0.153535	-0.706308	-0.65516
Niacin	-0.672278	0.957669	-0.376371	-0.283654	-0.195122	-0.391926	0.0353838	0.319808	-0.560533	-0.784847	-0.0165394	-0.735508	0.208669	-0.340341	0.429642	0.361812	0.26059	0.172825	-0.379663	-0.364463	-0.37595	0.0292423	0.241139	-0.0809375	-0.238524	-0.342513	-0.1745	0.706236	-0.12776	-0.434924	-0.898417	0.152262	-0.0355382	-0.520969	-0.105356	-0.101661	0.0892246	-0.180094	-0.259967	-0.50798	0.904211	-0.474345	-0.437697	-0.375202	0.0466823	-0.107875	0.774057	0.076107	-0.00365207
Nicotinamide	-0.0548103	0.585015	-0.416589	-0.214852	0.180149	-0.60232	-0.721269	0.0803924	-0.448707	-0.745759	0.357498	-0.854917	0.226158	-0.27727	0.0574525	0.811984	0.715393	0.460353	-0.495854	-0.238688	-0.479063	0.482284	-0.0383942	-0.227398	-0.0874674	0.512319	-0.335984	0.901797	0.668391	-0.551838	-0.774026	0.409668	-0.197517	-0.55938	-0.688628	-0.328478	0.982328	-0.488144	-0.462777	-0.501135	0.923009	-0.497751	-0.327884	-0.185651	-0.515234	-0.524035	0.299773	-0.196177	-0.160085
Panthotenic Acid	-0.25512	-0.218452	0.478399	0.115967	0.18615	0.527158	0.271772	-0.170092	-0.166551	-0.121322	-0.355953	0.686131	0.612003	0.595038	-0.0823497	0.212427	0.432856	0.633509	0.0724288	0.647318	0.554328	-0.254842	-0.146762	0.673962	-0.0616024	-0.457721	0.185451	0.442713	0.300837	0.288314	-0.0559531	-0.227968	0.24968	-0.00533269	0.606046	0.134526	0.471407	-0.195292	0.117813	-0.0364256	0.353578	-0.397957	-0.1661	-0.529854	0.344651	0.509545	0.252868	-0.373946	-0.272158
Pyridoxine-5-beta-D-glucoside	-0.221989	0.331654	0.00284761	-0.045577	0.383559	0.0438203	0.146393	-0.326643	-0.383956	-0.489879	-0.0573539	0.710874	0.358495	-0.13427	-0.462421	0.400265	0.30728	0.585603	-0.340079	0.0108128	-0.0857859	-0.292275	-0.627757	0.244112	-0.17827	-0.093352	-0.26072	0.529184	0.129232	-0.306822	-0.82648	-0.386779	0.0978089	0.285535	0.47183	0.0655853	0.321832	-0.329724	0.187995	0.245713	0.760982	-0.685084	0.109183	-0.0838371	-0.157621	0.332374	0.742382	-0.752022	-0.684617
[truncated: 70 more columns]
